# Supplementary material for: A mild AlCl3-catalyzed ethanol pretreatment and its effects on the structural changes of Eucalyptus wood lignin and the saccharification efficiency
Source: Royal Society of Chemistry journal article supplement (doi:10.1039/c6ra09640a), 2016-01-01
Supplement: c6ra09640a1.pdf [file c6ra09640a1.pdf]

**Table S1.** Assignments of  $^{13}\text{C}$ - $^1\text{H}$  cross-peaks in HSQC spectra of the lignin fractions isolated from *Eucalyptus* wood under different pretreatment conditions.

| label                        | $\delta_{\text{C}}/\delta_{\text{H}}$ | assignments                                                                              |
|------------------------------|---------------------------------------|------------------------------------------------------------------------------------------|
| $\text{C}_{\beta}$           | 52.4/3.51                             | $\text{C}_{\beta}$ - $\text{H}_{\beta}$ in phenylcoumaran substructures (C)              |
| $\text{B}_{\beta}$           | 53.5/3.07                             | $\text{C}_{\beta}$ - $\text{H}_{\beta}$ in $\beta$ - $\beta$ (resinol) substructures (B) |
| OMe                          | 55.6/3.73                             | C-H in methoxyls                                                                         |
| $\text{A}_{\gamma}$          | 59.4/3.65                             | $\text{C}_{\gamma}$ - $\text{H}_{\gamma}$ in $\beta$ - $O$ -4 substructures (A)          |
| $\text{C}_{\gamma}$          | 62.3/3.70                             | $\text{C}_{\gamma}$ - $\text{H}_{\gamma}$ in phenylcoumaran substructures (C)            |
| $\text{B}_{\gamma}$          | 71.0/3.80-4.18                        | $\text{C}_{\gamma}$ - $\text{H}_{\gamma}$ in $\beta$ - $\beta$ resinol substructures (B) |
| $\text{A}_{\alpha}$          | 71.7/4.83                             | $\text{C}_{\alpha}$ - $\text{H}_{\alpha}$ in $\beta$ - $O$ -4 linked to a S unit (A)     |
| $\text{A}_{\beta(\text{G})}$ | 83.5/4.32                             | $\text{C}_{\beta}$ - $\text{H}_{\beta}$ in $\beta$ - $O$ -4 linked to G/H unit (A)       |
| $\text{B}_{\alpha}$          | 84.9/4.64                             | $\text{C}_{\alpha}$ - $\text{H}_{\alpha}$ in $\beta$ - $\beta$ resinol substructures (B) |
| $\text{A}_{\beta(\text{S})}$ | 85.8/4.11                             | $\text{C}_{\beta}$ - $\text{H}_{\beta}$ in $\beta$ - $O$ -4 linked to a S unit (A)       |
| $\text{C}_{\alpha}$          | 87.1/5.44                             | $\text{C}_{\alpha}$ - $\text{H}_{\alpha}$ in phenylcoumaran substructures (C)            |
| $\text{S}_{2,6}$             | 103.6/6.67                            | $\text{C}_{2,6}$ - $\text{H}_{2,6}$ in syringyl units (S)                                |
| $\text{S}'_{2,6}$            | 106.2/7.29                            | $\text{C}_{2,6}$ - $\text{H}_{2,6}$ in oxidized S units (S')                             |
| $\text{G}_2$                 | 110.7/6.93                            | $\text{C}_2$ - $\text{H}_2$ in guaiacyl units (G)                                        |
| $\text{G}_5$                 | 114.8/6.92                            | $\text{C}_5$ - $\text{H}_5$ in guaiacyl units (G)                                        |
| $\text{G}_6$                 | 118.8/6.79                            | $\text{C}_6$ - $\text{H}_6$ in guaiacyl units (G)                                        |
| $\text{I}_{\alpha\beta}$     | 125.6/6.99                            | $\text{C}_{\alpha\beta}$ - $\text{H}_{\alpha\beta}$ instilbenes units                    |
| $\text{I}_2$                 | 106.2/7.31                            | $\text{C}_2$ - $\text{H}_2$ instilbenes units                                            |

**Table S2.** The yield of the lignin fractions isolated from *Eucalyptus* wood under different pretreatment conditions.

|                                  | L-180-0 | L-180 | L-170 | L-160 | L-150 | L-140 | L-130 |
|----------------------------------|---------|-------|-------|-------|-------|-------|-------|
| Yield of lignin <sup>a</sup> (%) | 28.52   | 48.69 | 35.41 | 45.29 | 29.82 | 38.48 | 20.95 |

<sup>a</sup>Yield of the lignin = (weight of lignin precipitated / weight of lignin in the raw biomass) × 100%.

## Results and Discussion

### 1. The yield of lignin

After same precipitation process, the lignin fractions were obtained and the corresponding yields varied from 20.95% to 48.69% (Table S2), and the highest value (48.69%) was achieved at 180 °C for 60 min with  $\text{AlCl}_3$  catalyst, while the lowest yield (20.95%) of lignin was obtained at 130 °C for 60 min with  $\text{AlCl}_3$  catalyst. In addition, it was observed that the yield of the lignin distinctly decreased from 38.48% to 29.82% with the temperature increased from 140 °C to 150 °C, while the delignification ratio reached to the maximum value at 150 °C, suggesting that the significant dissociation of the lignin occurred under this temperature and impeded the subsequent precipitation and acquisition, and the lowest molecular weight (690 g/mol) of the lignin obtained at 150 °C also provides some evidence for this phenomenon. However, the yield of lignin was then increased to 35.41-45.29% at 160-180 °C, which was probably attributed to the condensation of lignin at these conditions (temperatures higher than 150 °C), and it would be detailedly discussed in the following GPC and NMR sections. Interestingly, the yield of lignin obtained at 180 °C without  $\text{AlCl}_3$  was only 28.52%, which was obviously lower than that catalyzed by  $\text{AlCl}_3$  (48.69%) at the same temperature. The result implied that the addition of  $\text{AlCl}_3$  in EWS has significantly improved the delignification ratio and yield of lignin.

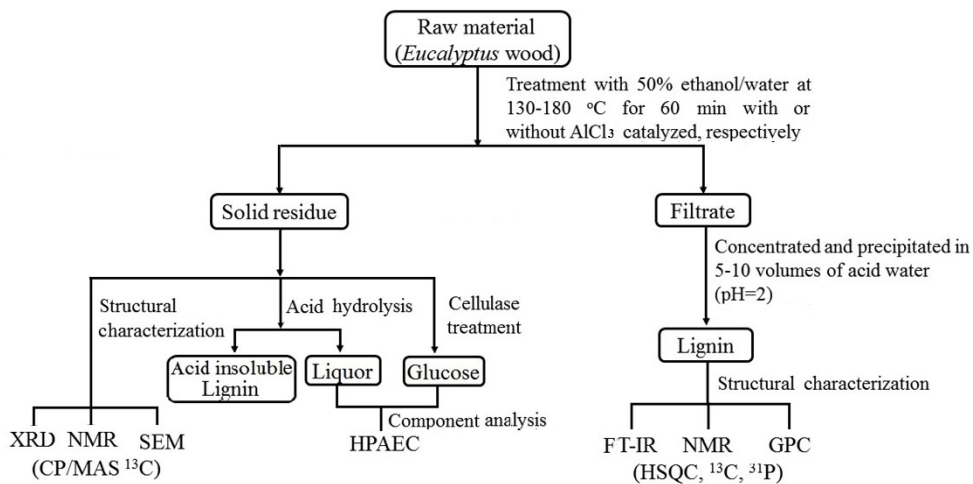

**Fig. S1.** Schematic illustration of the experimental procedure.



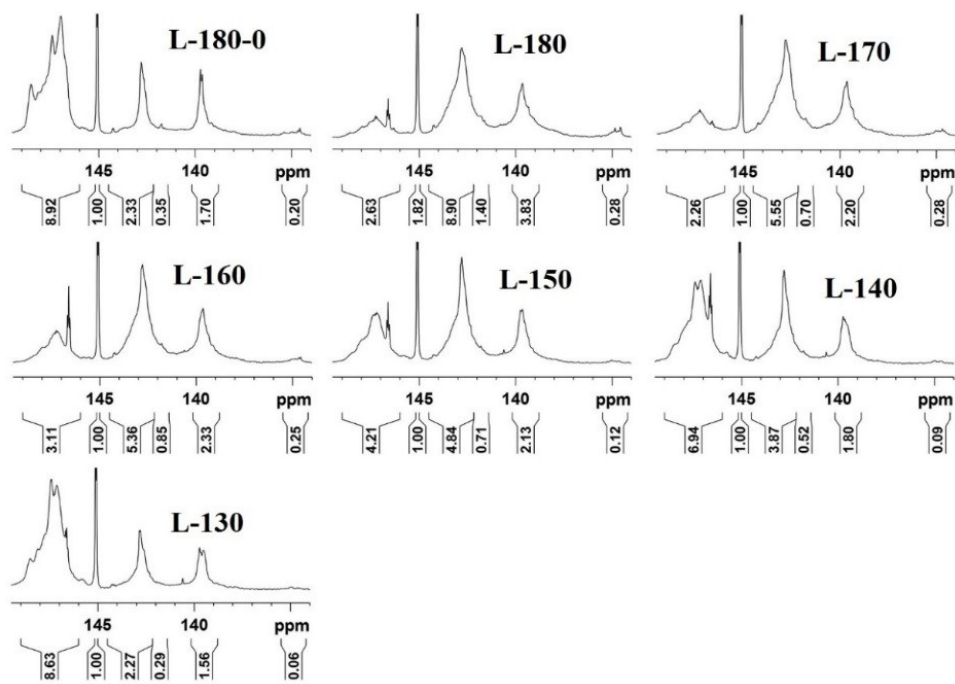

**Fig. S3.**  $^{31}\text{P}$ -NMR of the lignin fractions isolated from *Eucalyptus* wood under different pretreatment conditions.

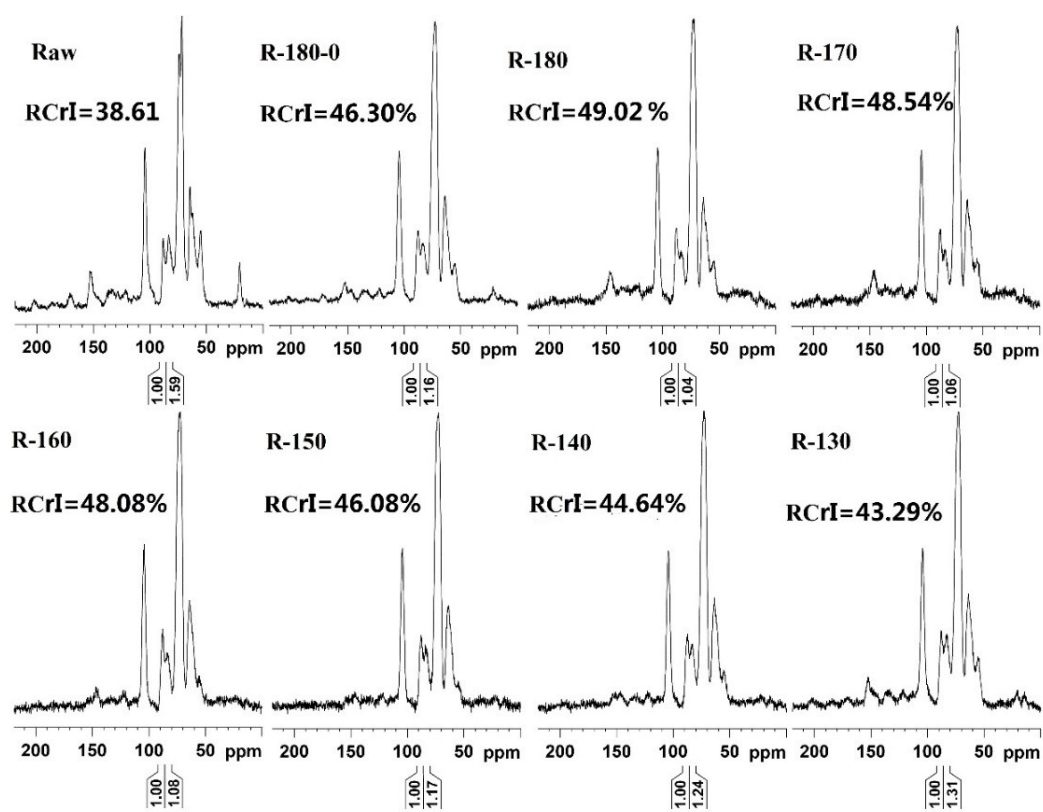

**Fig. S4.** CP/MAS  $^{13}\text{C}$  NMR characterization of the raw material and pretreated substrates.
